# Supplementary material
Source: PubMed Central journal article supplement (PMC7643742)

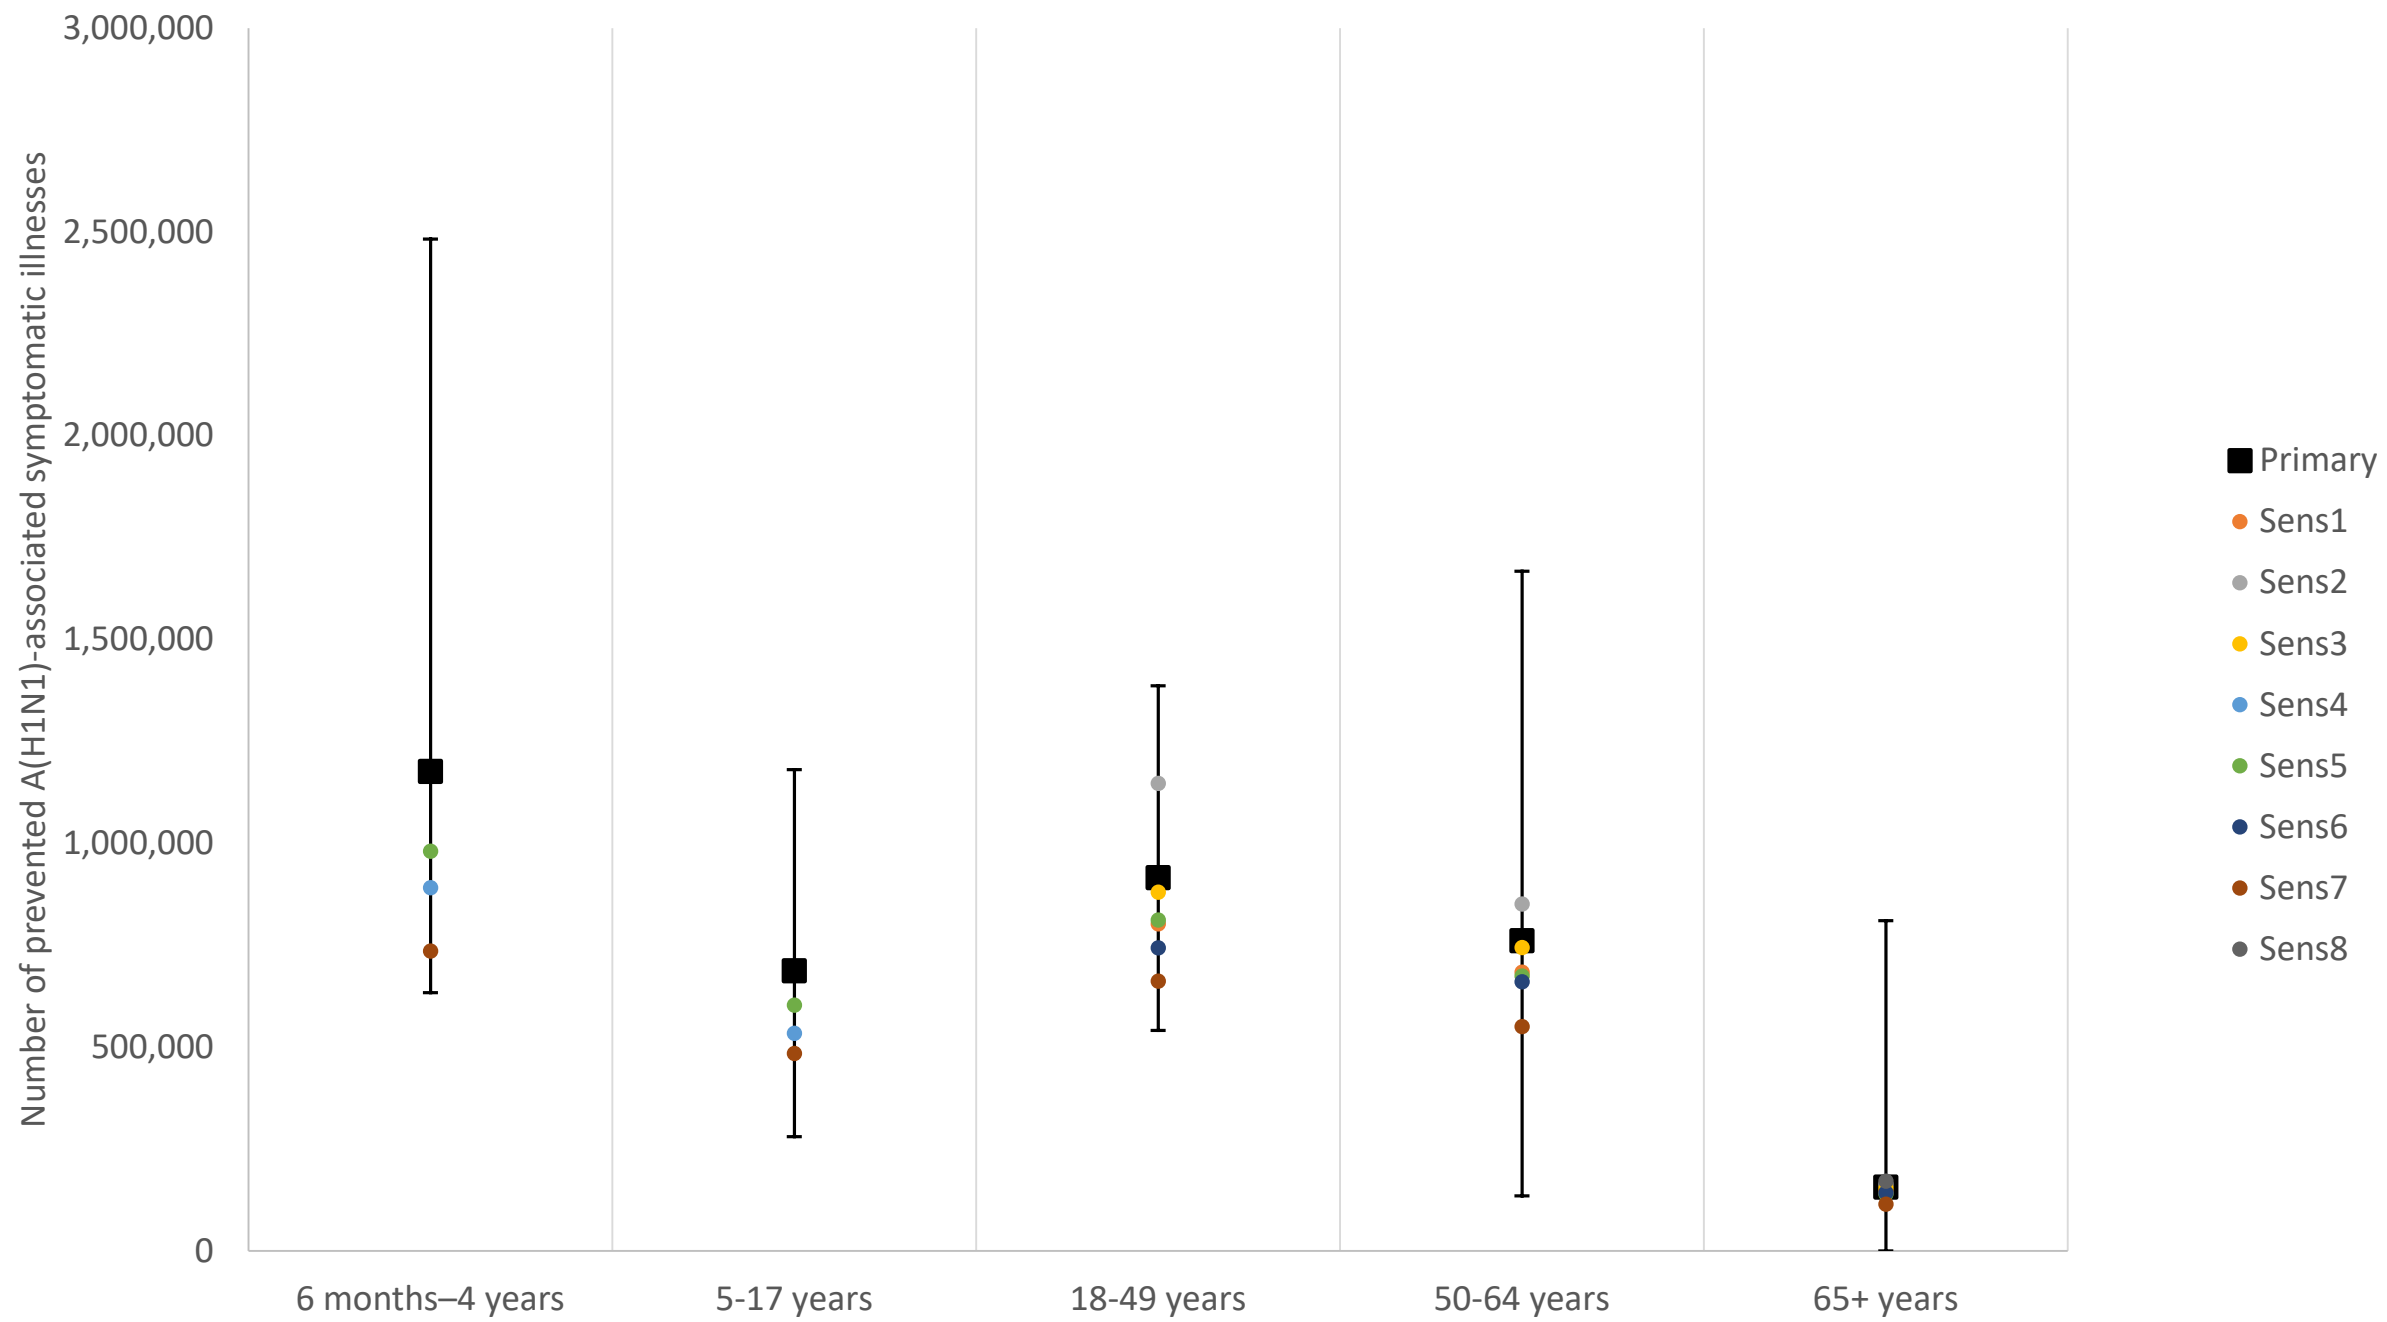

Supplement: ciz1244_suppl_supplementary_figure_2.pdf [file ciz1244_suppl_supplementary_figure_2.pdf]
